# Supplementary material for: Cerebrospinal fluid soluble TREM2 in aging and Alzheimer’s disease
Source: Springer Nature journal article supplement (doi:10.1186/s13195-016-0182-1), 2016-04-27
Supplement: MOESM1 [file 10057570]

SUPPLEMENTARY FIGURES (Fig S)

Supplementary figure 1 (Fig S1)

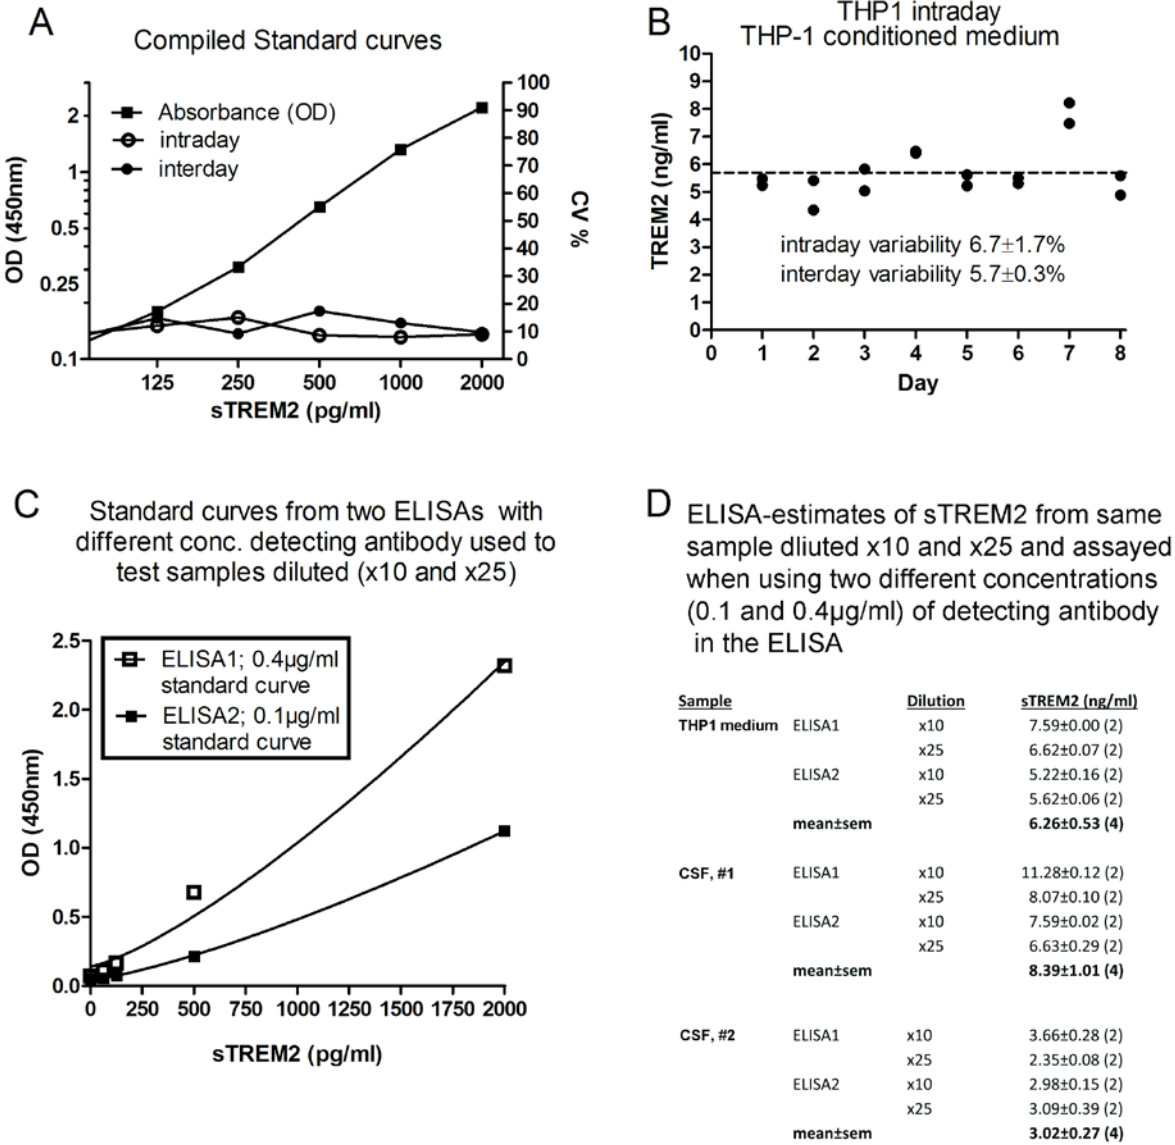

**Fig S1 ELISA Validation** (A) A compiled standard curve (n=6 from 3 different days) with variability. (B) Intraday and interday variability of a single sample conditioned medium (48h) of differentiated THP-1 cells. (C) Standard curves from ELISA with different concentration of the detecting antibody (0.1µg/ml and 0.4µg/ml). (D) Estimates of sTREM2-concentration in the same samples with two sample dilutions in these two ELISAs.

Supplementary figure 2 (Fig S2)

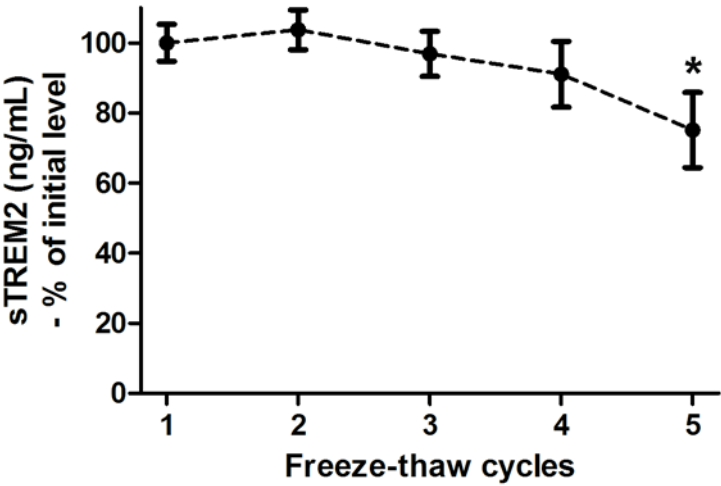

**Fig S2 Freeze-thaw cycles** Initial freeze-thaw cycles did not significantly affect sTREM2 levels. Two CSF samples were subjected to freeze-thaw cycles and sTREM2 levels were determined with sTREM2 ELISA. Data represent mean and standard deviation. Reduction in the sTREM2 level was analyzed by One-way ANOVA / Tukey's Multiple Comparison Test, \* indicates significant reduction in sTREM2 level as compared to initial concentration (p=0.001).

Supplementary figure 3 (Fig S3)

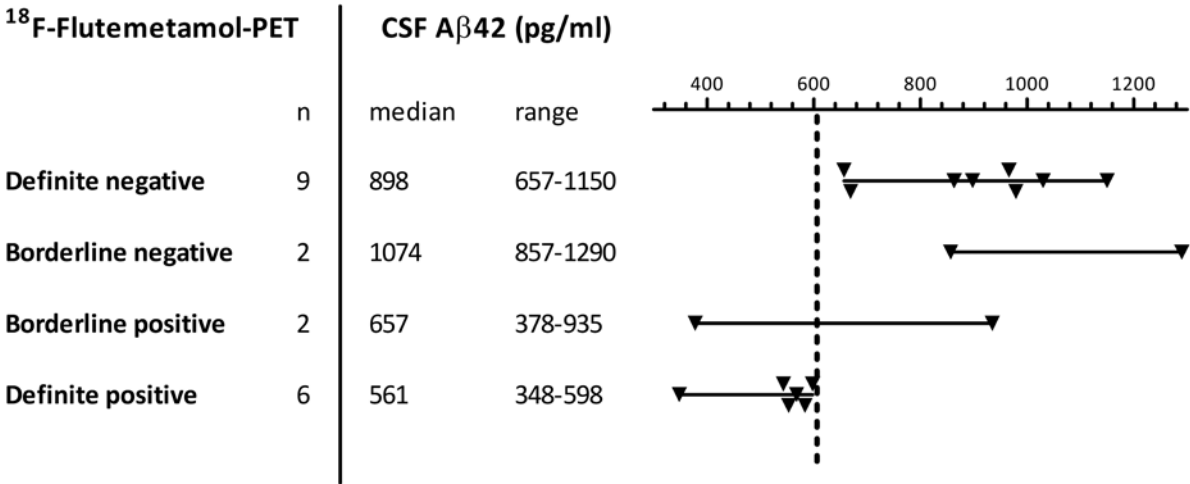

**Fig. S3 <sup>18</sup>F-Flutemetamol-amyloid-PET imaging and cerebrospinal fluid Aβ42 level.** The results of <sup>18</sup>F-Flutemetamol-amyloid- positron emission tomography (PET) imaging (<sup>18</sup>Flumetamol-PET) and CSF analyses of Aβ42 in 19 non-demented patients attending the Memory Clinic at Akershus University

Hospital. All patients with PET-scans interpreted as negative for brain amyloid, had CSF A $\beta$ 42 above 600 pg/ml (dotted line), while all with PET-scans interpreted as positive for brain amyloid had CSF A $\beta$ 42 below 600pg/ml. The only exception was one patient with CSF-A $\beta$ 42 935 pg/ml and a PET-scan read as marginally positive. Based on this, employing CSF A $\beta$ 42 > 700pg/ml as a cut-off would probably exclude most cases with substantial cerebral amyloid pathology.

**Supplementary figure 4 (Fig S4)**

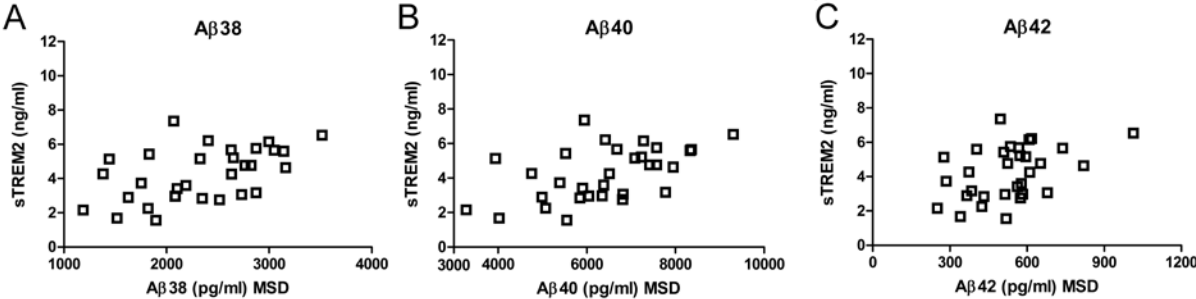

**Fig S4. Relationship between CSF sTREM2 and A $\beta$ 38, A $\beta$ 40 and A $\beta$ 42 Meso Scale Discovery analyses**  
Relationship between cerebrospinal fluid sTREM2- and levels of (A) A $\beta$ 38, (B) A $\beta$ 40 and (C) A $\beta$ 42 measured with MSD Multi-Spot Assay System (Meso Scale Discovery) in a selection of controls in the Norwegian cohort with high CSF A $\beta$ 42 (>700 pg/ml; n=31).

Supplementary figure 5 (Fig S5)

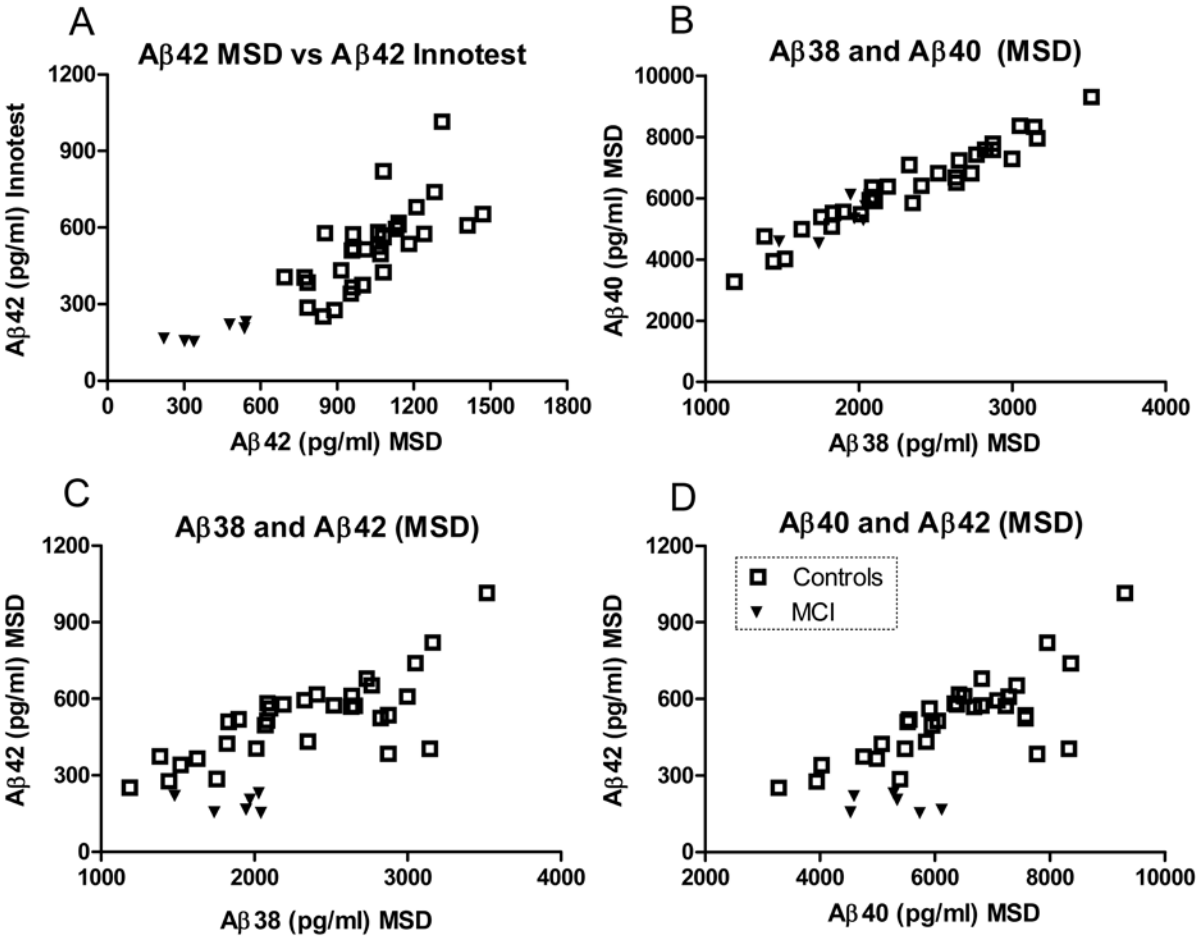

**Fig S5. Relationship between Aβ-measures with MSD Multi-Spot Assay System (Meso Scale Discovery) and Aβ42 Innotech ELISA (A) Relationship between Aβ42-Innotech ELISA and Aβ42-MSD, (B) Aβ40-MSD and Aβ38-MSD, (C) Aβ42-MSD and Aβ38-MSD, (D) Aβ42-MSD and Aβ40-MSD in a selection of in the Norwegian cohort (n=38).**

Supplementary figure 6 (Fig S6)

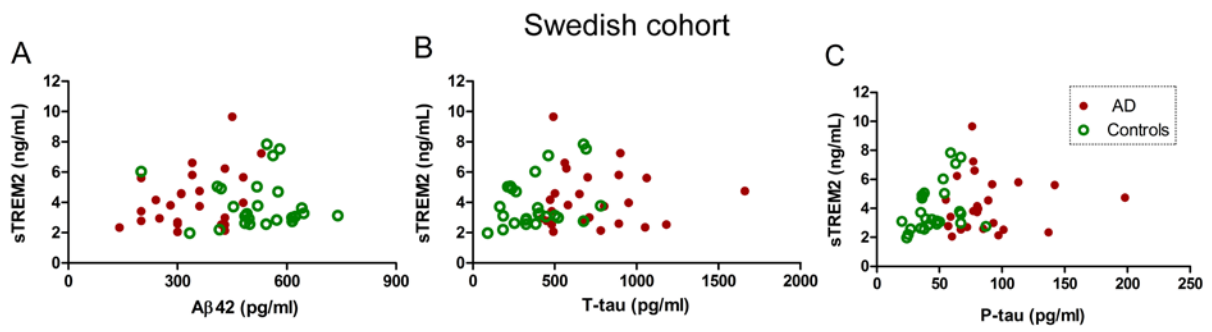

**Fig S6. Relationship between CSF levels of sTREM2 and neurodegenerative markers in the Swedish cohort.** Relationship between CSF sTREM2 levels and levels of (A) Aβ42, (B) T-tau and (C) P-tau in CSF among all subjects in the Swedish cohort.

Supplementary figure 7 (Fig S7)

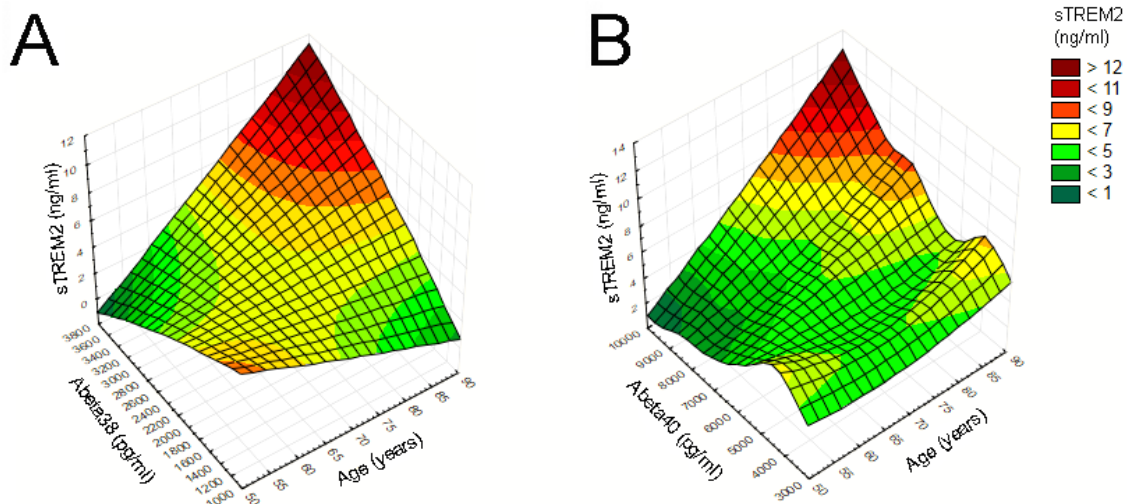

**Fig S7. Relationship between cerebrospinal fluid soluble TREM2, age and Aβ38/Aβ40**

Relationship between the CSF sTREM2 and age and (A) Aβ38, (B) Aβ40 among subjects with CSF level of Aβ42 >700pg/ml in the Norwegian cohort.

**Supplementary Table 1 (Table S1)**

**Correlations between different A $\beta$  peptide assays**

| <b>Correlations between A<math>\beta</math> peptides (n=38)</b> |                          |                       |                       |                       |
|-----------------------------------------------------------------|--------------------------|-----------------------|-----------------------|-----------------------|
|                                                                 | A $\beta$ 42<br>Innotest | A $\beta$ 38<br>(MSD) | A $\beta$ 40<br>(MSD) | A $\beta$ 42<br>(MSD) |
| A $\beta$ 42<br>Innotest                                        |                          | r=0.59<br>p<0.001     | r=0.58<br>p<0.001     | r=0.88<br>p<0.001     |
| A $\beta$ 38<br>(MSD)                                           | r=0.59<br>p<0.001        |                       | r=0.96<br>p<0.001     | r=0.74<br>p<0.001     |
| A $\beta$ 40<br>(MSD)                                           | r=0.58<br>p<0.001        | r=0.96<br>p<0.001     |                       | r=0.74<br>p<0.001     |
| A $\beta$ 42<br>(MSD)                                           | r=0.88<br>p<0.001        | r=0.74<br>p<0.001     | r=0.74<br>p<0.001     |                       |

Correlations are presented as Spearman Rho as not all data were normally distributed.

**Supplementary Table 2 (Table S2)**

**Multiple linear regression with CSF sTREM2**

| 2nd explanatory variable           | All controls               |                             | A $\beta$ 42 (Innotest)>700pg/ml |                             |
|------------------------------------|----------------------------|-----------------------------|----------------------------------|-----------------------------|
|                                    | Age                        | 2nd explanatory variable    | Age                              | 2nd explanatory variable    |
| A $\beta$ 42 (n=50/46)<br>Innotest | $\beta$ 1= 0.12<br>p<0.001 | $\beta$ 2= 0.003<br>p=0.01  | $\beta$ 1= 0.12<br>p<0.001       | $\beta$ 2= 0.003<br>p=0.01  |
| A $\beta$ 38 (n=32/31)<br>(MSD)    | $\beta$ 1= 0.07<br>p=0.02  | $\beta$ 2= 0.001<br>p=0.01  | $\beta$ 1= 0.08<br>p=0.02        | $\beta$ 2= 0.001<br>p=0.01  |
| A $\beta$ 40 (n=32/31)<br>(MSD)    | $\beta$ 1= 0.07<br>p=0.03  | $\beta$ 2= 0.0005<br>p=0.01 | $\beta$ 1= 0.07<br>p=0.02        | $\beta$ 2= 0.0005<br>p=0.01 |
| A $\beta$ 42 (n=32/31)<br>(MSD)    | $\beta$ 1= 0.08<br>p=0.01  | $\beta$ 2=0.003<br>p =0.03  | $\beta$ 1= 0.09<br>p=0.008       | $\beta$ 2= 0.004<br>p=0.02  |
| P-tau (n=50/46)                    | $\beta$ 1= 0.09<br>p=0.007 | $\beta$ 2= 0.04<br>p=0.02   | $\beta$ 1= 0.11<br>p=0.003       | $\beta$ 2= 0.04<br>p =0.02  |
| T-tau (n=50/46)                    | $\beta$ 1= 0.11<br>p=0.002 | $\beta$ 2= 0.003<br>p=0.11  | $\beta$ 1= 0.12<br>p=0.001       | $\beta$ 2= 0.003<br>p=0.14  |

A $\beta$ 42 Innotest, P-tau and T-tau analyses: All controls n=50, A $\beta$ 42 (Innotest)>700pg/ml; n=46

A $\beta$ 38 (MSD), A $\beta$ 40 (MSD), A $\beta$ 42 (MSD) analyses: All controls n=32, A $\beta$ 42 (Innotest)>700pg/ml; n=31
